# Supplementary material for: Combinatorial Clustering of Residue Position Subsets Predicts Inhibitor Affinity across the Human Kinome
Source: PLOS journal article supplement (doi:10.1371/journal.pcbi.1003087), 2013-06-06
Supplement: S4 (10.1371/journal.pcbi.1003087.s004) [file journal.pcbi.1003087.s004]

301 Moved Permanently

# Moved Permanently

The document has moved here.

---

Apache Server at www.ploscompbiol.org Port 80
