# Supplementary material for: Combinatorial Clustering of Residue Position Subsets Predicts Inhibitor Affinity across the Human Kinome
Source: PLOS journal article supplement (doi:10.1371/journal.pcbi.1003087), 2013-06-06
Supplement: S4 (10.1371/journal.pcbi.1003087.s004) [file journal.pcbi.1003087.s004]

## Text S1: Supporting Information

### Combinatorial clustering of residue position subsets predicts inhibitor affinity across the human kinome

Drew H. Bryant, Mark Moll, Paul Finn, and Lydia E. Kavraki

## Kinome dataset preparation: eukaryotic protein kinase alignment

In the case of the ePKs, both the non-TKS (PFAM:Pkinase) and TKS (PFAM:Pkinase.Tyr) were combined into a single, comprehensive structural dataset in order to provide structural coverage for the full kinase family tree. However, determining an appropriate residue position correspondence *between* the TK and non-TK family alignments requires an additional alignment step, in order to relate columns from the TK alignment to columns of the non-TK alignment. Several approaches for obtaining a consistent and high-quality alignment between the TKS and non-TKS were considered, such as profile-profile alignment and structure-based alignment.

To provide a structure-based solution to determining a high-quality residue position correspondence between the TKS and non-TKS, MATT [1] (version 1.00) was selected due to its ability to focus the alignment on regions of structural similarity (e.g., the ATP binding site) while disregarding regions with low structural similarity (e.g., C-terminal region). The kinase domain of non-TKS and TKS was then aligned using MATT by structural superposition of a pair of representative structures (PDB:3HEC and PDB:2PLO, respectively), that had both been co-crystallized with the same ATP binding site inhibitor (imatinib). The alignment RMSD of the common core region (220 residues) identified by MATT was 2.156 Å; the RMSD of the bound imatinib molecules was 1.736 Å. The MATT alignment is shown for the binding site residue positions analyzed here in Figure S1; the C<sub>α</sub> RMSD of the 27 binding site residues shown is 1.169 Å. The aligned computed by MATT is shown below.

Core Residues: 220

Core RMSD: 2.156

|        |                                                              |     |     |
|--------|--------------------------------------------------------------|-----|-----|
| 3HEC:A | R-----PTFYRQELNKTIWEVPERYQNLSPVGSAYG-----SVC                 | 39  | (A) |
| 2PLO:A | -GSHMQTKPKPWWEDEWVP-----RETLKLVERLG-----AGQFGEVW             | 260 | (B) |
| 3HEC:A | AAFDTKTGLRVAVKKLSRPFQSII--HAKRTYRELRLKHKHENVIGLLDVFTPARSLE   | 97  | (A) |
| 2PLO:A | MGYYNG-HTKVAVKSLKQ--G---SMPDAFLAEANLMKQLQHQLVRLYAVVTQ-----   | 309 | (B) |
| 3HEC:A | EFNDVYLVTHLM-GADLNNIVKC---QKLTDDHVQFLIYQILRGLKYIHSADIHRDLKP  | 153 | (A) |
| 2PLO:A | --EPIYIITEYMENGLVDFLKTPTSGIKLTINKLLDMAAQIAEGMAFIEERNYIHRDLRA | 367 | (B) |
| 3HEC:A | SNLAVNEDCELKILDFGLARHTDDEMTGYVA-----TRWYRAPEIM               | 194 | (A) |
| 2PLO:A | ANILVSDTLCKIADF-----GLARLIEDNEYTAREGAKFPIKWTAPEAI            | 412 | (B) |
| 3HEC:A | LNWMHYNQTVDIWSVGCIMAELLTG-RTLF--PGTDHIDQLKLI--LRLVGTPGAELLKK | 249 | (A) |
| 2PLO:A | NYGT-FTIKSDVWSFGILLTEIVTHGRIPYPGMTNP--EVIQNLERGYR-----       | 458 | (B) |
| 3HEC:A | ISSESARNYIQLTQMPKMNFA-NVFIGANPLAVDLLEKMLVLDSDKRITAAQALAHAYF  | 308 | (A) |
| 2PLO:A | -----MVRPDNCPEELYQLMRLCWKERPEDRPTFDYLRVS-LE                  | 495 | (B) |
| 3HEC:A | AQYHDPDDEPVADPYDQSFESRDLLIDEWKSLEYDEVISFVPPP-----            | 352 | (A) |
| 2PLO:A | D-----FFTATEGQYQPQP                                          | 509 | (B) |

## References

1. Menke M, Berger B, Cowen L (2008) Matt: local flexibility aids protein multiple structure alignment. PLoS Comput Biol 4: e10.
